# Supplementary material
Source: HighWire-hosted journal article supplement (https://www.cmaj.ca/highwire/filestream/76576/field_highwire_adjunct_files/0/191636-five-1-at.pdf)
Supplement: 191636-five-1-at.pdf [file 191636-five-1-at.pdf]

Appendix 1 (as submitted by the authors): Supplementary figure

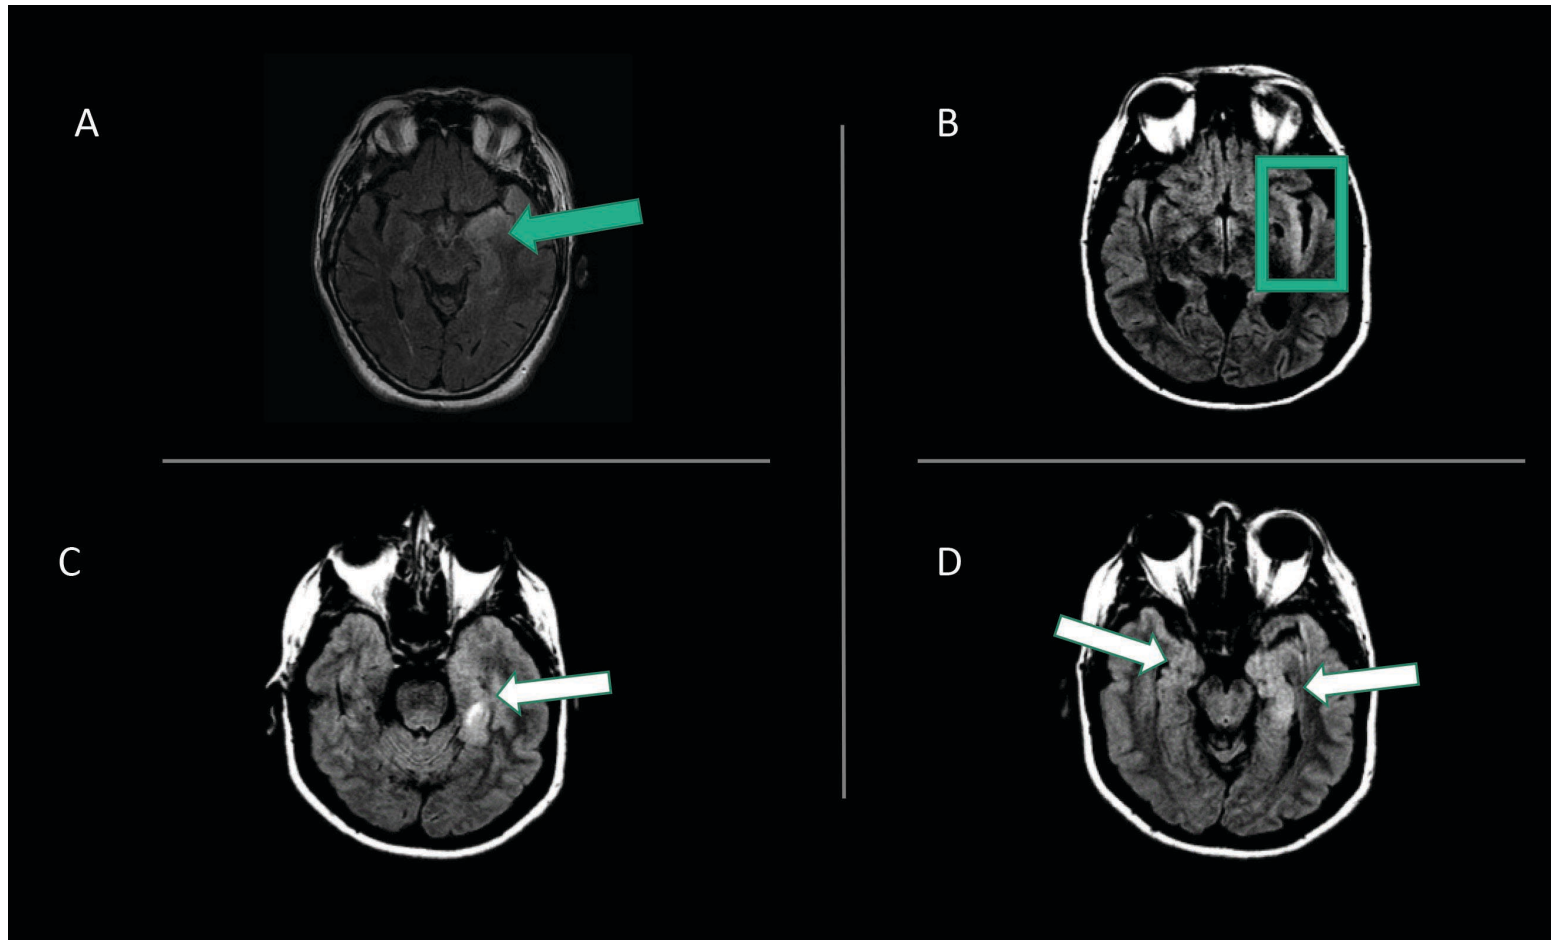

- MRI brain imaging may demonstrate a variety of findings in HSVE.
- Axial MRI Brain FLAIR image demonstrating abnormal left medial temporal lobe signal hyper-intensity in a patient with confirmed HSV1 encephalitis. (Panel A, green arrow).

Appendix to: Kapadia R, Tyler KL, Pastula DM. Encephalitis in adults caused by herpes simplex virus. *CMAJ* 2020. doi: 10.1503/cmaj.191636.

Copyright © 2020 The Author(s) or their employer(s).

To receive this resource in an accessible format, please contact us at [cmajgroup@cmaj.ca](mailto:cmajgroup@cmaj.ca).

- From a different patient with confirmed HSV1 encephalitis, Panel B, C, D, demonstrate axial MRI brain FLAIR images. In this patient, there is left insular cortex signal hyperintensity (Panel B, green box), and bilateral asymmetric temporal lobe abnormal hyper-intensity (Panel C & D, white arrows).
